# Supplementary material
Source: PubMed Central journal article supplement (PMC1866195)

## Supplemental material

### Figure S1

**A)** An overview of the *S. solfataricus* exosome with RNA bound in the central channel. **B)** A sequence alignment of the loop of Rrp41 involved in RNA binding in the channel. The included sequences are: *S. solfataricus* (SULSO), *P. furiosus* (PYRFU), *A. fulgidus* (ARCFU), *H. sapiens* (HUMAN) and *S. antibioticus* (STRAN). Conserved residues contacting RNA are shown in green and putative RNA binding residues for hRrp41 in blue. Numbers in parenthesis denote overall percentage identity of the full-length proteins to the *S. solfataricus* sequence. **C)** Close-up of the density and model at the entrance of the channel. In cyan is the loop of Ss-Rrp41 forming the constriction where the ribonucleotide binds. **D)** Close-up of the entrance of the central channel in the human exosome shown in a similar orientation to that in Panel C). The corresponding loop in Hs-Rrp41 is shown in stick representation.

### Figure S2

The manganese binding site found in the *S. solfataricus* exosome is not catalytic. To test whether the manganese binding site observed in the structure supports RNase activity, U8 RNA was incubated with the *S. solfataricus* exosome complex in the presence of manganese. Lane 2 shows that the native Rrp41-Rrp42-Rrp4 complex phosphorolytically degrades the U8 RNA molecule. In lanes 4-8 the phosphorolytically dead Rrp41(D182A)-Rrp42-Rrp4 complex was incubated with U8 RNA for 1, 5, 10, 30 and 60 minutes showing no signs of RNase activity.

Furthermore, native Rrp41-Rrp42-Rrp4 complex also does not support RNase activity in the presence of  $MnCl_2$  when inorganic phosphate is absent (lane 9).

## **Supplemental experimental procedures**

### **RNA degradation assays**

The RNase assays shown in Fig. S2 were carried out by incubating 20 pmol of Ss-Rrp41-Rrp42-Rrp4 wild-type or D182A mutant complexes with 1 nmol of U8 RNA in 40  $\mu$ l total volume. For the positive control (lane 2), the RNA was incubated with the native protein complex at 70°C for 30 min in a buffer containing 20 mM Tris-HCl pH 7.6, 60 mM KCl, 10 mM  $MgCl_2$ , 0.1 mM EDTA, 10% glycerol, 1U/ $\mu$ l RNasin, 10 mM  $Na_2HPO_4$  and 2 mM DTT. To test for manganese supported RNase activity (lanes 3-9), native and D182A mutant complexes were incubated with RNA in a buffer containing manganese instead of magnesium and without inorganic phosphate: 20 mM Tris-HCl pH 7.6, 60 mM KCl, 1 mM  $MnCl_2$ , 0.1 mM EDTA, 10% glycerol, 1U/ $\mu$ l RNasin and 2 mM DTT. Reaction products were resolved on a 20% polyacrylamide gel containing 8M urea and visualized with toluidine.

**A**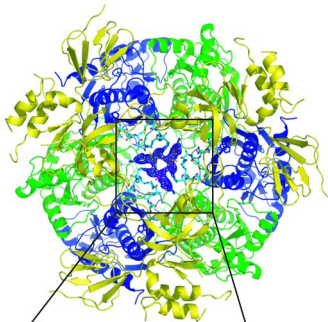**B**

SULSO Rrp41: 62-KEM**HP**RHLQ-70

PYRFU Rrp41: 60-REI**HP**KHLQ-68 (78%)

ARCFU Rrp41: 60-REV**HP**RHLQ-68 (72%)

HUMAN Rrp41: 56-IER**G**SRARA-64 (38%)

STRAN PNP-C: 372-MLRME**Q**QLD-380 (27%)

**C**

Central channel of  
archaeal exosome

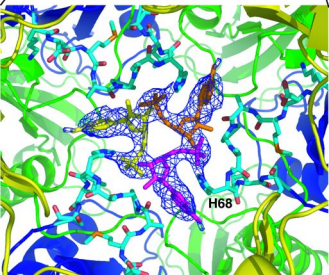**D**

Central channel of  
human exosome

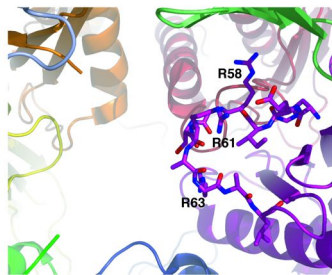

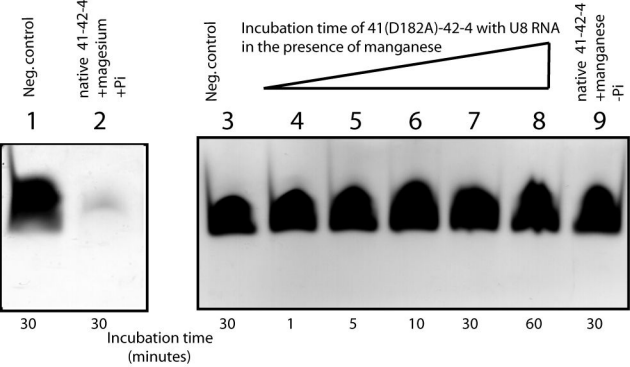

Supplement: 7400945-s1.pdf [file 7400945-s1.pdf]
